# Supplementary material for: Tumor Suppressor Function of miR-127-3p and miR-376a-3p in Osteosarcoma Cells
Source: MDPI journal article supplement (doi:10.3390/cancers11122019), 2019-12-14
Supplement: s1 [file s1]

# Supplementary Materials: Tumor Suppressor Function of miR-127-3p and miR-376a-3p in Osteosarcoma Cells

Joerg Fellenberg, Burkhard Lehner, Heiner Saehr, Astrid Schenker and Pierre Kunz

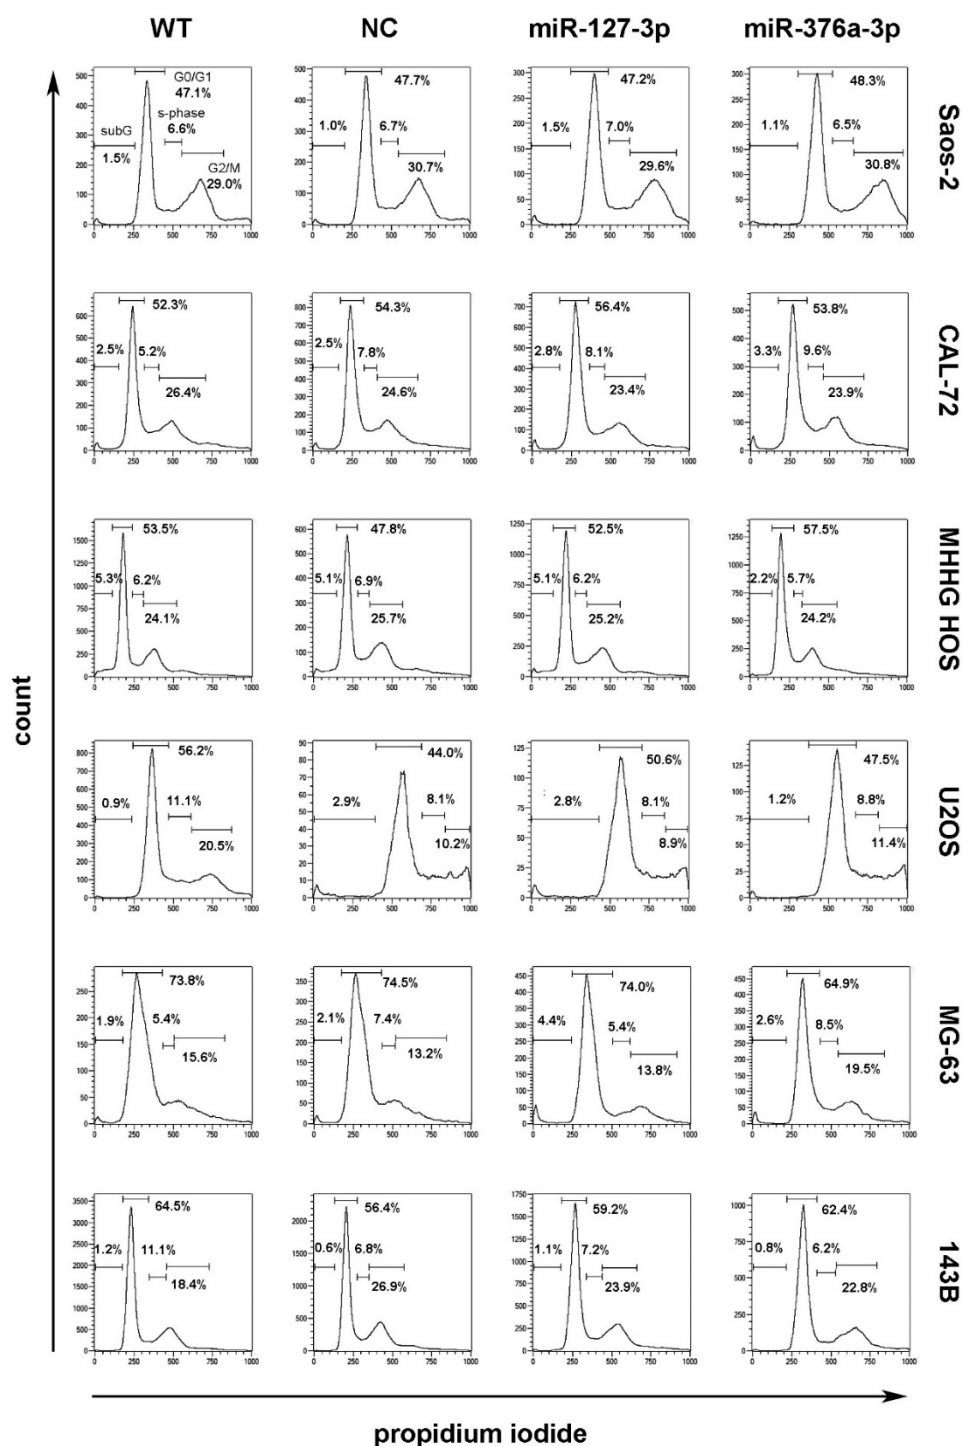

**Figure S1.** Cell cycle analysis of osteosarcoma cells with restored miRNA expression. The percentage of cells in the subG, G0/G1-, S- and G2/M-phase was determined 96 h after transfection

by flow cytometry. Representative graphs out of three independent experiments are shown for each cell line. (WT = wild type; NC = negative control miRNA).

**Table S1.** Patient characteristics.

| ID  | Gender | Age (years) | Max. Diameter (cm) | Localization | Subtype                        | Regression Grade | Metastases |
|-----|--------|-------------|--------------------|--------------|--------------------------------|------------------|------------|
| OS1 | f      | 14          | 9.5                | femur        | osteoblastic                   | 4                | -          |
| OS2 | f      | 39          | 13                 | femur        | osteoblastic - fibroblastic    | 5                | -          |
| OS3 | m      | 17          | 16                 | femur        | osteoblastic - teleangiectatic | 2                | -          |
| OS4 | f      | 12          | 8.5                | femur        | chondroblastic                 | 3                | -          |
| OS5 | f      | 17          | 10                 | femur        | osteoblastic                   | 3                | -          |
| OS6 | m      | 29          | 5                  | tibia        | osteoblastic - chondroblastic  | 3                | -          |
| OS7 | f      | 17          | 10                 | humerus      | chondroblastic                 | 4                | -          |
| OS8 | m      | 21          | 14                 | tibia        | osteoblastic                   | 4                | +          |

regression grade: according to Salzer Kuntschik (1 = good response; 6 = poor response).

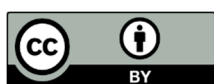

© 2019 by the authors. Licensee MDPI, Basel, Switzerland. This article is an open access article distributed under the terms and conditions of the Creative Commons Attribution (CC BY) license (<http://creativecommons.org/licenses/by/4.0/>).
